# Supplementary material
Source: publisher figshare collection journal article supplement (https://sage.figshare.com/ndownloader/files/38308140)
Supplement: Supplementary file 1 [file 38308140]

The following scenario was read out to each participant.

*“An ex-27 week infant, now 37 weeks corrected, is in HDU in an incubator due to temperature instability. He is normally self-ventilating in **room air** and takes his feeds **via bottle every 3 hours**.*

*You are not looking after the infant but are working in the room. The nurse looking after the infant is on her break. As you walk past the incubator you notice the monitor is alarming and the infant has saturations of 65% and is bradycardic at **105 beats per minute**. When you look at the infant you notice some milk in his mouth and **that the infant is not** breathing.*

*Please manage the infant as you would normally”.*

## **Appendix A: Simulation Scenario Descriptor**
